# Supplementary material
Source: PubMed Central journal article supplement (PMC6236336)

Figure 1D Immunoblot analysis

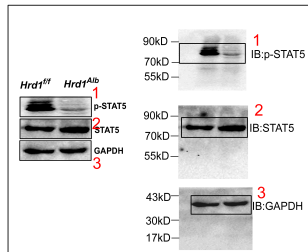

Supplement: EMBJ-37-e98942-s002.pdf [file EMBJ-37-e98942-s002.pdf]

Figure 3F Immunoblot analysis

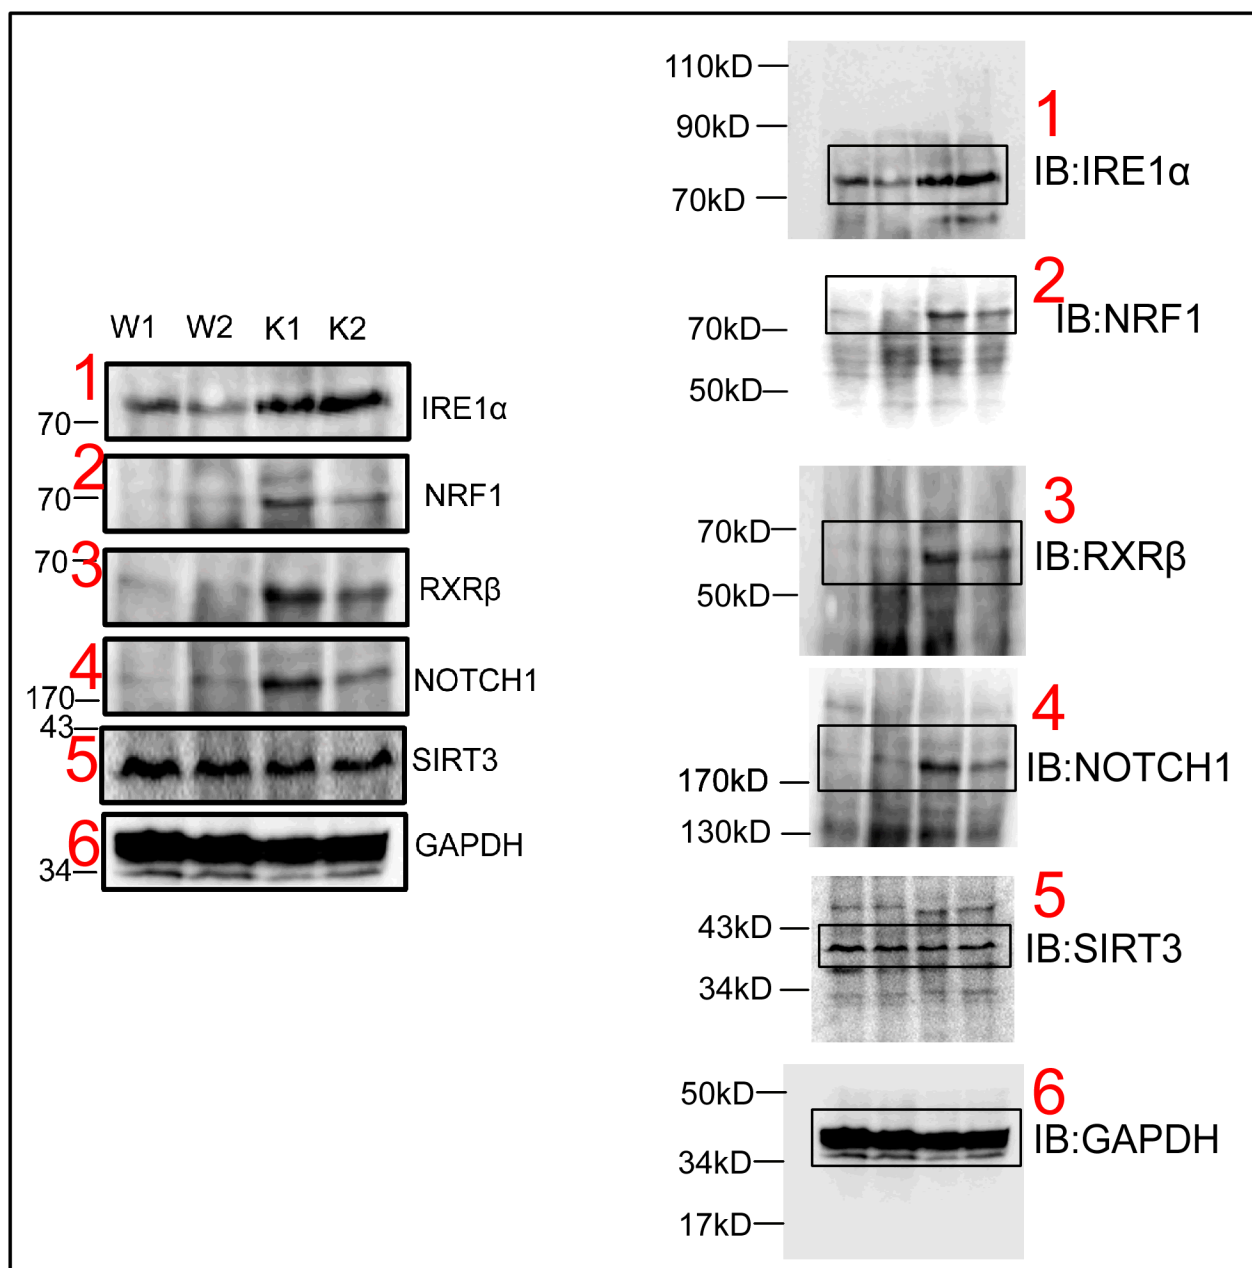

Supplement: EMBJ-37-e98942-s003.pdf [file EMBJ-37-e98942-s003.pdf]

Figure 6B Immunoblot analysis

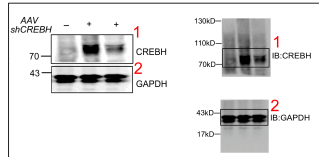

Supplement: EMBJ-37-e98942-s006.pdf [file EMBJ-37-e98942-s006.pdf]
